# Supplementary material for: Continuous passive paracentesis versus large-volume paracentesis in the prevention and treatment of intra-abdominal hypertension in the critically ill cirrhotic patient with ascites (COPPTRIAHL): study protocol for a randomized controlled trial
Source: Springer Nature journal article supplement (doi:10.1186/s13063-023-07541-4), 2023-08-15
Supplement: MOESM2 [file 25925576]

Protocolo de monitorização de Pressão Intra-Abdominal

**Elaboração**

Dr. Rui Pereira, Enf. Vitor Inácio, Enf. Duarte Mateus e Enf. Vitor Almeida (UCIP7, HCC, CHULC)

**Objetivo**

Protocolo de procedimento para colocação de sistema de monitorização da pressão intra-abdominal e manutenção do sistema.

**Siglas e Abreviaturas**

PIA - Pressão Intra-Abdominal

HIA - Hipertensão Intra-Abdominal

SCA - Síndrome de Compartimento Abdominal

PPA - Pressão de Perfusão Abdominal

mmHg - milímetros de mercúrio

UCIP - Unidade de Cuidados Intensivos

TA - tensão arterial

## Definições

### **Pressão Intra-Abdominal**

O valor normal da PIA situa-se entre 5-7 mmHg e considera-se patológico quando é igual ou superior 12 mmHg de forma repetida ou mantida.

A medição da PIA é indireta, via vesical, com instilação de 25 cc de soro através da algália, como doente em decúbito supino, relaxado, com o nível zero de pressão do sistema da linha média axilar do doente, correspondente ao eixo flebostático, tal como para a medição da pressão arterial.

### **Hipertensão Intra-Abdominal**

A HIA define-se pela manutenção de valores de PIA igual ou superior a 12 mmHg.

A classificação da HIA apresenta quatro graus (I-IV) de acordo com o valor de PIA:  
grau I: 12-15 mmHg; grau II: 16-20 mmHg; grau III: 21-25 mmHg; grau IV: > 25 mmHg.

A HIA pode ser **primária** (processo patológico de origem abdomino-pélvica), **secundária** (processo patológico de origem extra cavidade abdomino-pélvica) ou **recorrente** (quando reaparece após terapêutica do processo de HIA).

### **Síndrome de Compartimento Abdominal**

A SCA define-se por um valor PIA igual ou superior a 20 mmHg associado a disfunção orgânica de novo.

### **Pressão de Perfusão Abdominal**

A PPA reflete o gradiente de pressão entre o sistema arterial e venoso que mantém o fluxo sanguíneo através dos órgãos intra-abdominais.

A fórmula da PPA é a seguinte:  $PPA = TA \text{ média} - PIA$

O valor de PPA considerado normal é igual ou superior 60mmHg. Valores inferiores a 55 mmHg estão associados com aumento de mortalidade.

### **Descrição**

1. A presença de PIA elevada em 3 mensurações seguidas por avaliação indirecta com intervalos de 4/6h reforça a sua fiabilidade.
2. As indicações para a avaliação da PIA incluem:
  - a. - Trauma abdominal (ex. fechado ou aberto, hemorragia retroperitoneal, fraturas pélvicas, queimaduras extensas);
  - b. - Cirurgia abdominal major (ex. neoplasias, pancreatite, oclusão intestinal, rotura de aneurismas da aorta abdominal)
  - c. - Patologia médica (ex. choque séptico, ascite, obesidade mórbida)
3. São contra-indicações para a medição da PIA as situações como rotura vesical e bexiga neurogénica.
4. Todas as intervenções para colocação, manutenção e avaliação da PIA devem respeitar a técnica asséptica.
5. A preparação do material para a avaliação da PIA deve incluir:

## Protocolo de monitorização de Pressão Intra-Abdominal

- a. - Módulo de avaliação de pressão e cabo de monitorização.
  - b. - Sistema com Soro Fisiológico a 0.9% (500cc).
  - c. – Sistema de vias de pressão.
  - d. - Conector 3/8x1/4LL (Maquet (R))
  - e. - Seringa de 50 mL.
  - f. - Material de desinfeção (compressas, luvas. campo esterilizado, álcool 70%).
6. A montagem do sistema de monitorização da PIA:
- a. -- Adaptar o conector 3/8x1/4 entre a algália e o sistema de medição horária de diurese.
  - b. -- Adaptar sistema de vias de pressão entre o Conector 3/8x1/4LL (Maquet (R)) e módulo de avaliação de pressão.
  - c. -- Conectar Soro Fisiológico a 0.9% (500cc) ao módulo de avaliação de pressão.
  - d. – Configurar o monitor para medição de PIA utilizando o modo de “PVC” (pressão venosa central).
7. -- Proceder à avaliação da PIA de acordo com a indicação clínica.
8. O procedimento de avaliação da PIA consiste em:
- a. - A unidade de medição é "mmHg".
  - b. - Avaliação da PIA de forma intermitente.
  - c. - Avaliação da TA média simultaneamente com a PIA
  - d. - Selecionar no monitor do doente o módulo de "Pressão venosa central", que serve igualmente para a monitorização da PIA.

## Protocolo de monitorização de Pressão Intra-Abdominal

- e. - Posicionar o doente, relaxado, em decúbito dorsal com a cama a zero graus (0º) de inclinação.
  - f. - Colocar o transdutor da PIA e da TA ambos ao nível da linha média axilar, no eixo flebostático, de preferência dentro do leito do doente para minimizar desvios.
  - g. - Clampar o sistema de dispositivo urinário para evitar fuga do soro instilado para o dispositivo coletor e erro de medição da PIA.
  - h. - Realizar a calibração do nível "zero" de pressão do sistema de monitorização da PIA e da TA.
  - i. - Desinfetar a torneira do sistema de monitorização de pressão com álcool 70%.
  - j. - Com a seringa de 50 mL, aspirar 25 mL de solução de cloreto de sódio a 0,9%, do sistema de monitorização de pressão e injetar na cavidade vesical.
  - k. - Ligar o sistema de pressões à cavidade vesical e aguardar 30-60 segundos pelo valor numérico associado à presença de uma curva de pressão, caracteristicamente pouco oscilante.
  - l. - Considerar o valor médio da PIA (a medição da PIA deve considerar o momento final da expiração do doente, o valor habitualmente mais baixo).
  - m. - Desclampar o sistema após a avaliação
9. Registrar o valor da PIA no SClínico.
10. Registrar o valor da TA média no SClínico.

11. O volume de cloreto de sódio 0,9% instilado na bexiga para o procedimento deve ser subtraído ao débito urinário dessa hora.
12. Se valores de PIA iguais ou superiores a 12mmHg, deve repetir-se o procedimento de 4/4h.
13. Vigiar complicações da monitorização da PIA (infecção de trato urinário), equivalentes às da algaliação do doente.
14. Na manutenção do sistema para avaliação da PIA deve-se:
15. Substituir todo o sistema a cada 72 horas.
16. Identificar o sistema de PIA e o módulo.

### **Referências bibliográficas**

Kirkpatrick et al. Intra-abdominal hypertension and the abdominal compartment syndrome: updated consensus definitions and clinical practice guidelines from the World Society of the Abdominal Compartment Syndrome. Intensive Care Med. 2013 Jul;39(7):1190-206.
